# Supplementary material
Source: Springer Nature journal article supplement (https://www.springermedizin.de/resource/supplementary/12916_2010_307_MOESM7_ESM.pdf/9599600)

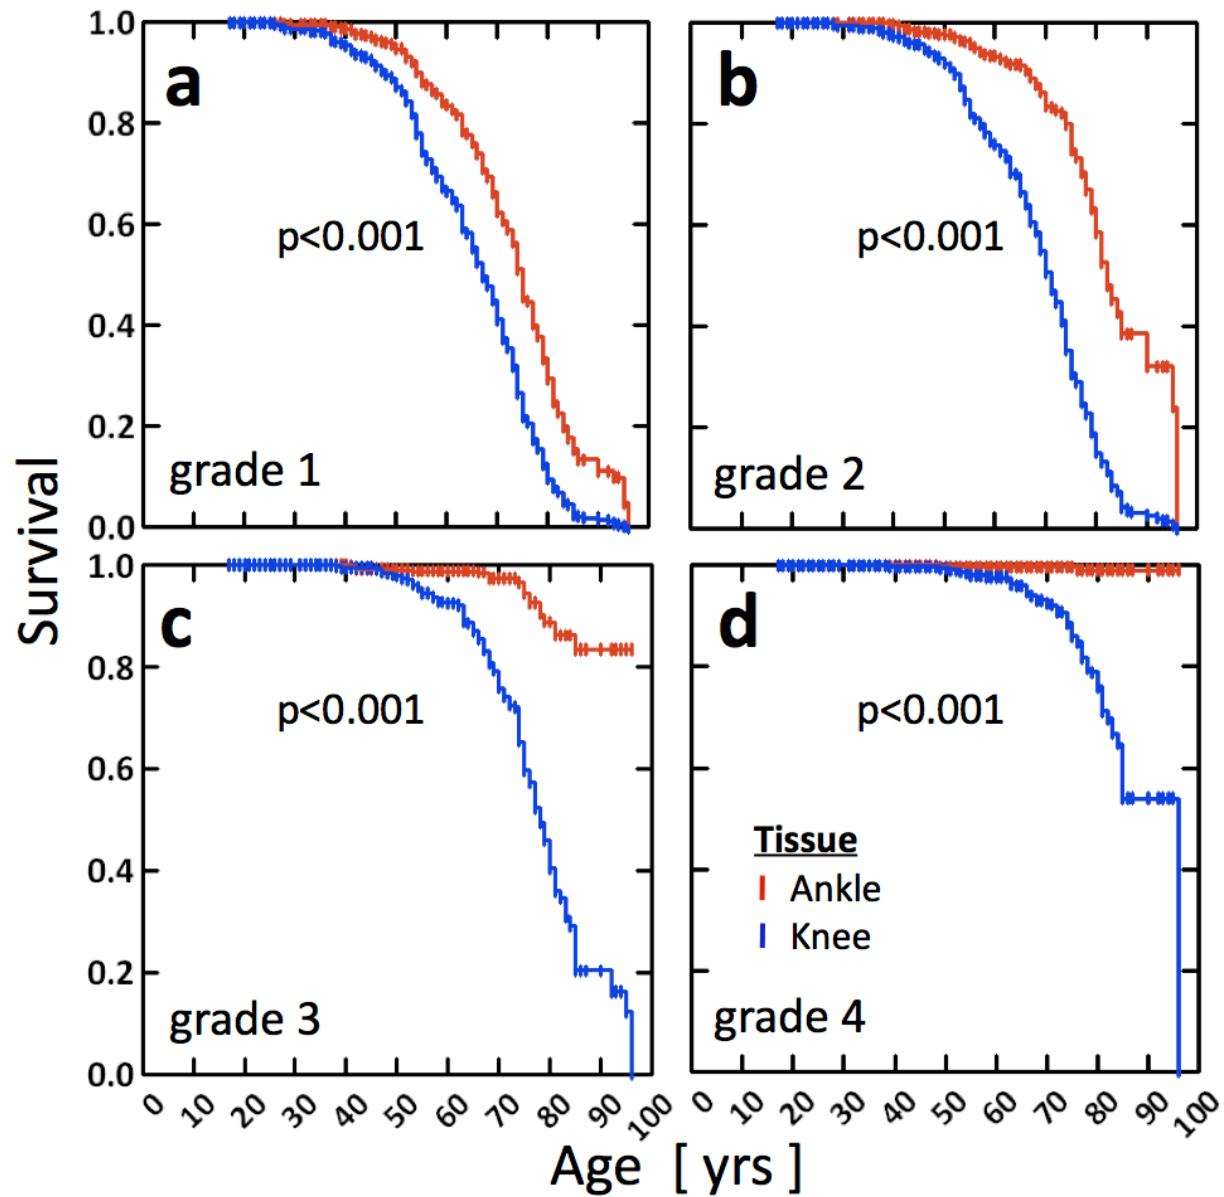

Supplement: MOESM7 [file 9599600]
